# Supplementary material
Source: PubMed Central journal article supplement (PMC3159526)
Supplement: Supp_Data.pdf [file Supp_Data.pdf]

## Supplementary Methods

### Western Blot Analysis

Cardiac biopsies obtained for Western blotting were snap-frozen in liquid nitrogen. Specimens were pulverized, homogenized in 10 volumes of triple-detergent lysis buffer [50mM Tris, pH 8.0, 0.1% SDS, 1.0% Triton X-100, 0.5% DOC, 5mM EDTA, 50mM DTT, 0.4 tab/10 mL Complete protease inhibitor (Roche, Indianapolis, IN)], and centrifuged at 13,000 rpm for 5 minutes. Protein concentration of the supernatant was then determined using the BioRad Protein Assay (Hercules, CA). 50 ug of each sample were electrophoresed on a 4-20% SDS-polyacrylamide gel (Lonza, Rockland, ME) following the addition of 2X sample loading buffer (130mM Tris, pH = 8.0, 20% glycerol, 4.6% SDS, 2% DTT, 0.02% bromophenol blue) and 5 minutes of denaturation at 100°C. Proteins were then transferred to Immobilon-P (Millipore, Bedford, MA) using the iBlot transfer apparatus (Invitrogen, Carlsbad, CA). The membrane was subsequently blocked with 5% nonfat dry milk in Tris-buffered saline containing 0.05%

Tween 20. Immunoblotting was performed to detect phospholamban (1:500, Millipore, Temecula, CA), phospho-S16-phospholamban (1:500, Upstate, Lake Placid, NY), and GAPDH as loading control (1:2000, Santa Cruz Biotechnology, Santa Cruz, CA). Detection was performed using the Super Signal West Pico Chemiluminescent Substrate kit (Pierce, Rockford, IL). Since the dnPLB being expressed via AAV is a pseudo-phosphorylated mutant, the ratio of phospho-PLB to total PLB (normalized to GAPDH as a loading control) was calculated as previously described (Kaye *et al.*, 2007).

### Reference

Kaye, D.M., Prevolos, A., Marshall, T., Byrne, M., Hoshijima, M., Hajar, R., Mariani, J.A., Pepe, S., Chien, K.R., and Power, J.M. (2007). Percutaneous cardiac recirculation-mediated gene transfer of an inhibitory phospholamban peptide reverses advanced heart failure in large animals. *J. Am. Coll. Cardiol.* 50, 253–260.

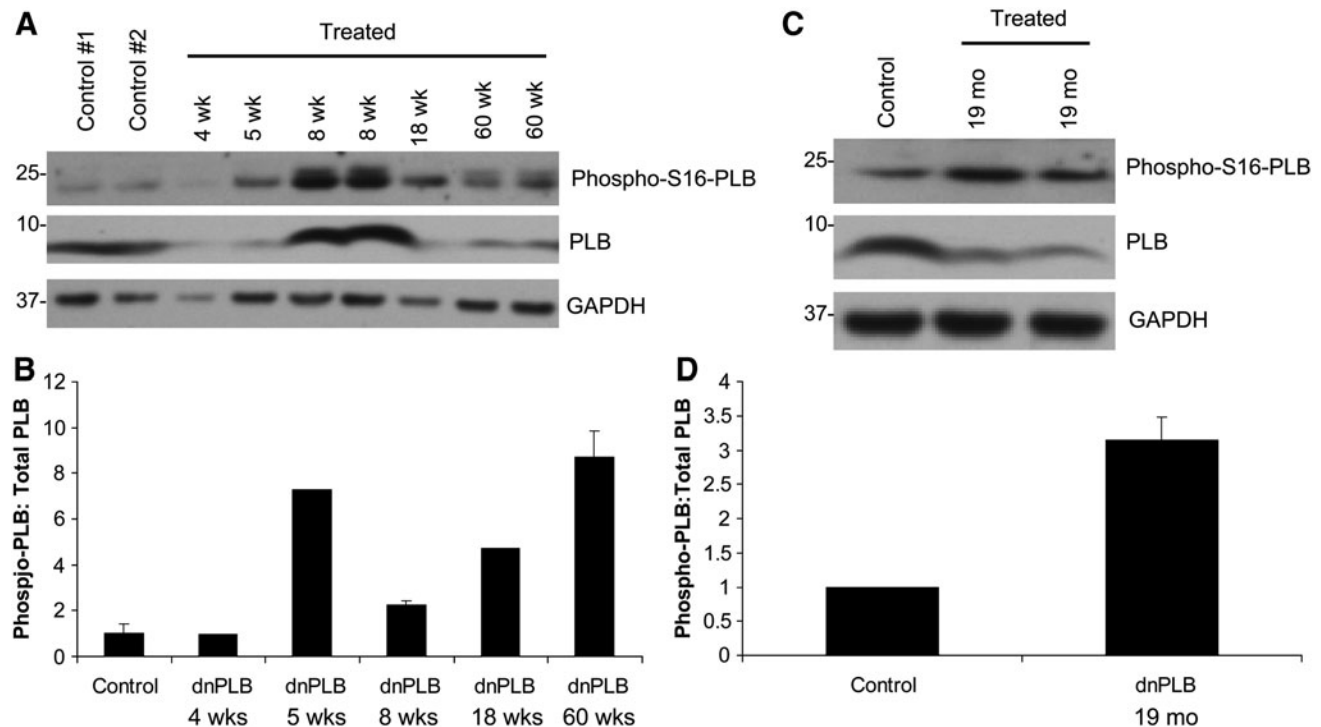

**SUPPLEMENTARY FIG. S1.** Western blot demonstrating cardiac expression of PLB in canines treated with scAAV6-CB-dnPLB. Since the dnPLB being expressed via AAV is a pseudo-phosphorylated mutant, the ratio of phospho-PLB to total PLB (normalized to GAPDH as a loading control) was calculated as previously described (Kaye *et al.*, 2007). Expression of PLB was confirmed both (A, B) in canines prior to its use in this study, and (C, D) in one of the long-term canines from this study at 19 months vs. AAV capsid control.
